# Supplementary material for: An electronic voting scheme based on homomorphic encryption and decentralization
Source: PeerJ Comput Sci. 2023 Oct 18;9:e1649. doi: 10.7717/peerj-cs.1649 (PMC10703064; doi:10.7717/peerj-cs.1649)
Supplement: Supplemental Information 3 [file peerj-cs-09-1649-s003.xlsx]

## Sheet: Sheet1
1000	2000	4000	7000	10000
